# Supplementary material for: Standardization of ELISA protocols for serosurveys of the SARS-CoV-2 pandemic using clinical and at-home blood sampling
Source: PubMed Central journal article supplement (PMC7782755; doi:10.1038/s41467-020-20383-x), 2021-01-04
Supplement: 41467_2020_20383_MOESM4_ESM.pdf [file 41467_2020_20383_MOESM4_ESM.pdf]

## **Description of Additional Supplementary Files**

File Name: Supplementary Data 1

Description: Protein sequence data for ELISA antigen constructs
